# Supplementary material
Source: PubMed Central journal article supplement (PMC7428849)
Supplement: NIHMS1614856-supplement-Supplemenntary.pdf [file NIHMS1614856-supplement-Supplemenntary.pdf]

## NMR Characterization of Rearranged Staurosporine Aglycone Analogues from the Marine Sponge *Damiria* sp.

Trong D. Tran,<sup>1,†</sup> Laura K. Cartner,<sup>1,2</sup> Heidi R. Bokesch,<sup>1,2</sup> Curtis J. Henrich,<sup>1,2</sup> Xin W. Wang,<sup>3</sup> Chulabhorn Mahidol,<sup>4,5</sup> Somsak Ruchirawat,<sup>4,5,6</sup> Prasat Kittakoop,<sup>4,5,6</sup> Barry R. O'Keefe,<sup>1</sup> Kirk R. Gustafson<sup>\*,†</sup>

<sup>1</sup>Molecular Targets Program, Center of Cancer Research, National Cancer Institute, Frederick, Maryland 21701-1201, United States

<sup>2</sup>Basic Science Program, Leidos Biomedical Research, Inc., Frederick National Laboratory for Cancer Research sponsored by the National Cancer Institute, Frederick, Maryland 21702-1201, United States

<sup>3</sup>Laboratory of Human Carcinogenesis, Center for Cancer Research, National Cancer Institute, Bethesda, Maryland 20892, United States

<sup>4</sup>Chulabhorn Research Institute, Kamphaeng Phet 6 Road, Laksi, Bangkok 10210, Thailand

<sup>5</sup>Chulabhorn Graduate Institute, Chemical Biology Program, Chulabhorn Royal Academy, Kamphaeng Phet 6 Road, Laksi, Bangkok 10210, Thailand

<sup>6</sup>Center of Excellence on Environmental Health and Toxicology (EHT), CHE, Ministry of Education, Bangkok, Thailand

<sup>†</sup>Current address: GeneCology Research Centre, University of the Sunshine Coast, Maroochydore DC, Queensland 4558, Australia

### SUPPORTING INFORMATION

**Figure S1.** <sup>1</sup>H Spectrum of **1** in DMSO-*d*<sub>6</sub>

**Figure S2.** <sup>13</sup>C Spectrum of **1** in DMSO-*d*<sub>6</sub>

**Figure S3.** HSQC Spectrum of **1** in DMSO-*d*<sub>6</sub>

**Figure S4.** COSY Spectrum of **1** in DMSO-*d*<sub>6</sub>

**Figure S5.** HMBC (*J* = 8 Hz) Spectrum of **1** in DMSO-*d*<sub>6</sub>

**Figure S6.** HMBC (*J* = 3 Hz) Spectrum of **1** in DMSO-*d*<sub>6</sub>

**Figure S7.** ROESY Spectrum of **1** in DMSO-*d*<sub>6</sub>

**Figure S8.** <sup>1</sup>H Spectrum of **2** in DMSO-*d*<sub>6</sub>

**Figure S9.** <sup>13</sup>C Spectrum of **2** in DMSO-*d*<sub>6</sub>

**Figure S10.** HSQC Spectrum of **2** in DMSO-*d*<sub>6</sub>

**Figure S11.** COSY Spectrum of **2** in DMSO- $d_6$

**Figure S12.** HMBC ( $J = 8$  Hz) Spectrum of **2** in DMSO- $d_6$

**Figure S13.** HMBC ( $J = 3$  Hz) Spectrum of **2** in DMSO- $d_6$

**Figure S14.** LR-HSQMBC ( $J = 2$  Hz) Spectrum of **2** in DMSO- $d_6$

**Figure S15.** ROESY Spectrum of **2** in DMSO- $d_6$

**Figure S16.**  $^1\text{H}$ - $^{15}\text{N}$  HSQC Spectrum of **2** in DMSO- $d_6$

**Figure S17.** Underwater Photograph of *Damiria* sp.

**Figure S18.** NCI-60 Cell Line Anticancer Screening Data

**Figure S19.** GIAO nuclear magnetic shielding tensors for damirines A (**1**) in DMSO

**TABLE S1.** Calculated  $^{13}\text{C}$  and  $^1\text{H}$  chemical shifts in DMSO- $d_6$  using TMS or benzene as a standard reference and their statistical parameters.

Figure S1.  $^1\text{H}$  Spectrum of **1** in  $\text{DMSO-}d_6$

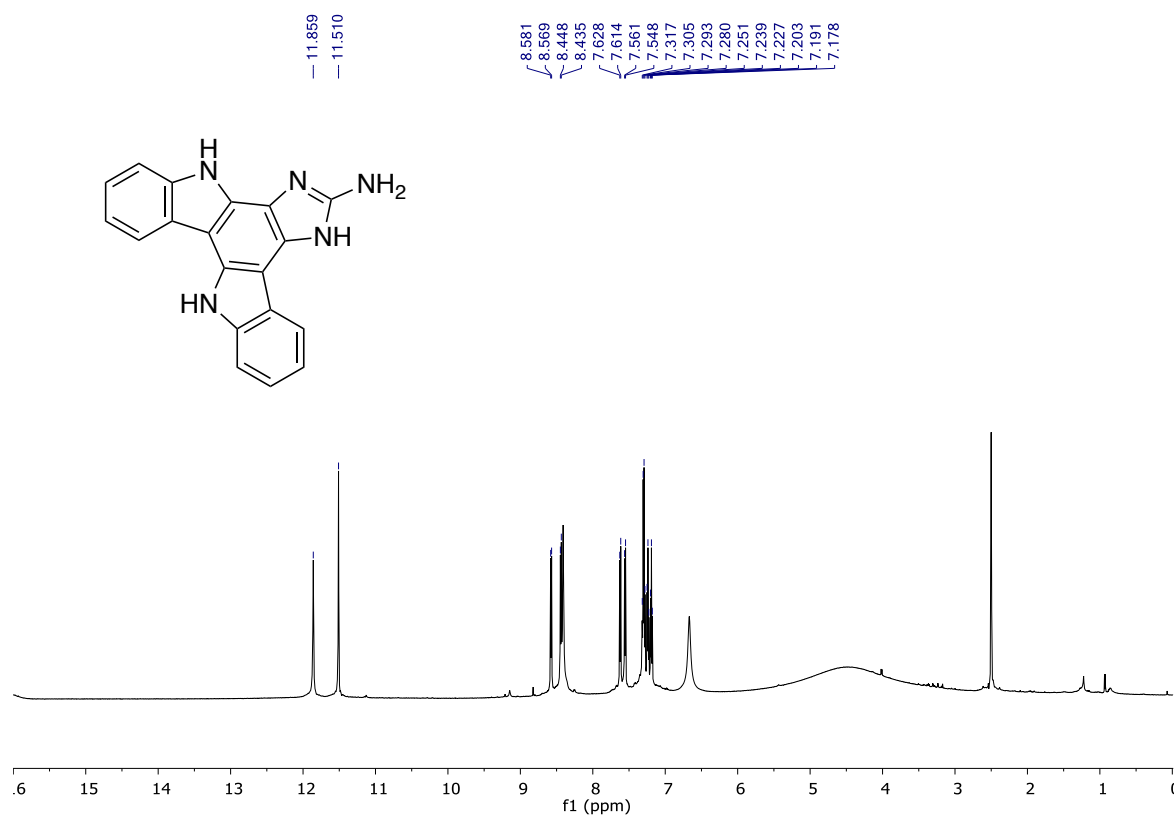

Figure S2.  $^{13}\text{C}$  Spectrum of **1** in  $\text{DMSO-}d_6$

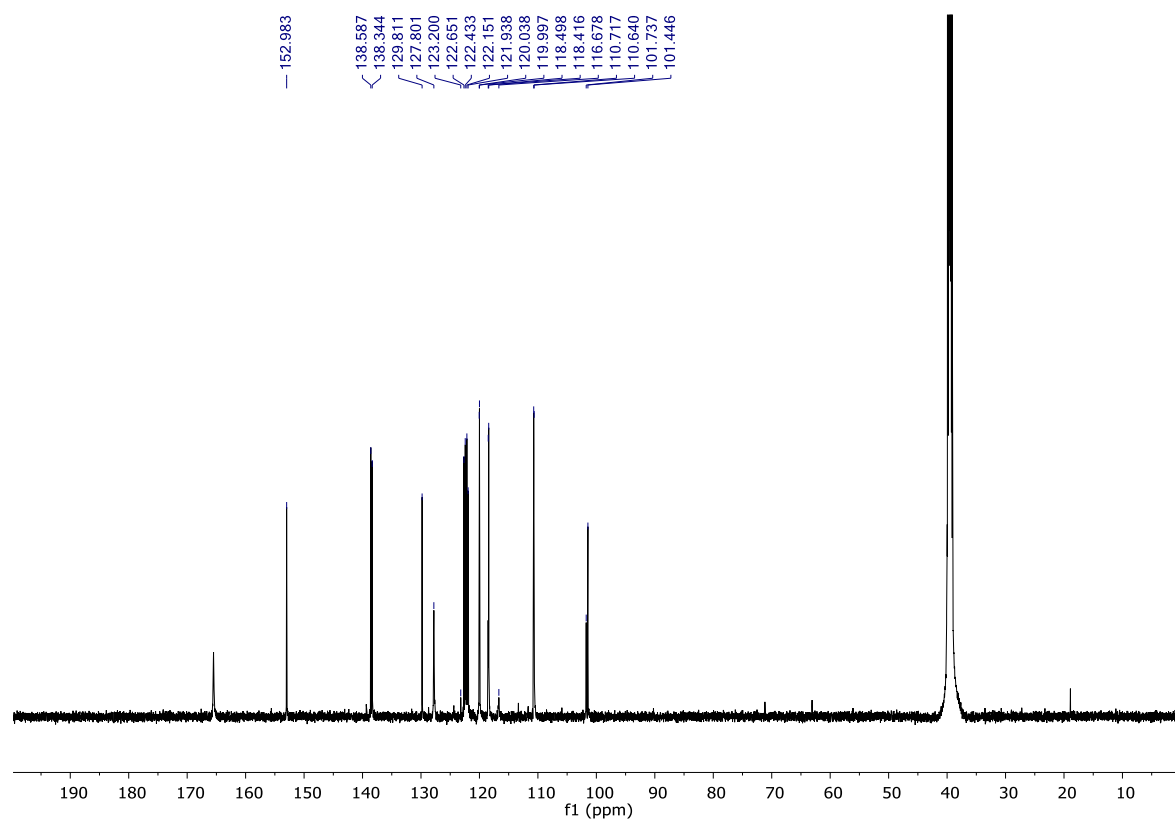

**Figure S3.** HSQC Spectrum of **1** in DMSO-*d*<sub>6</sub>

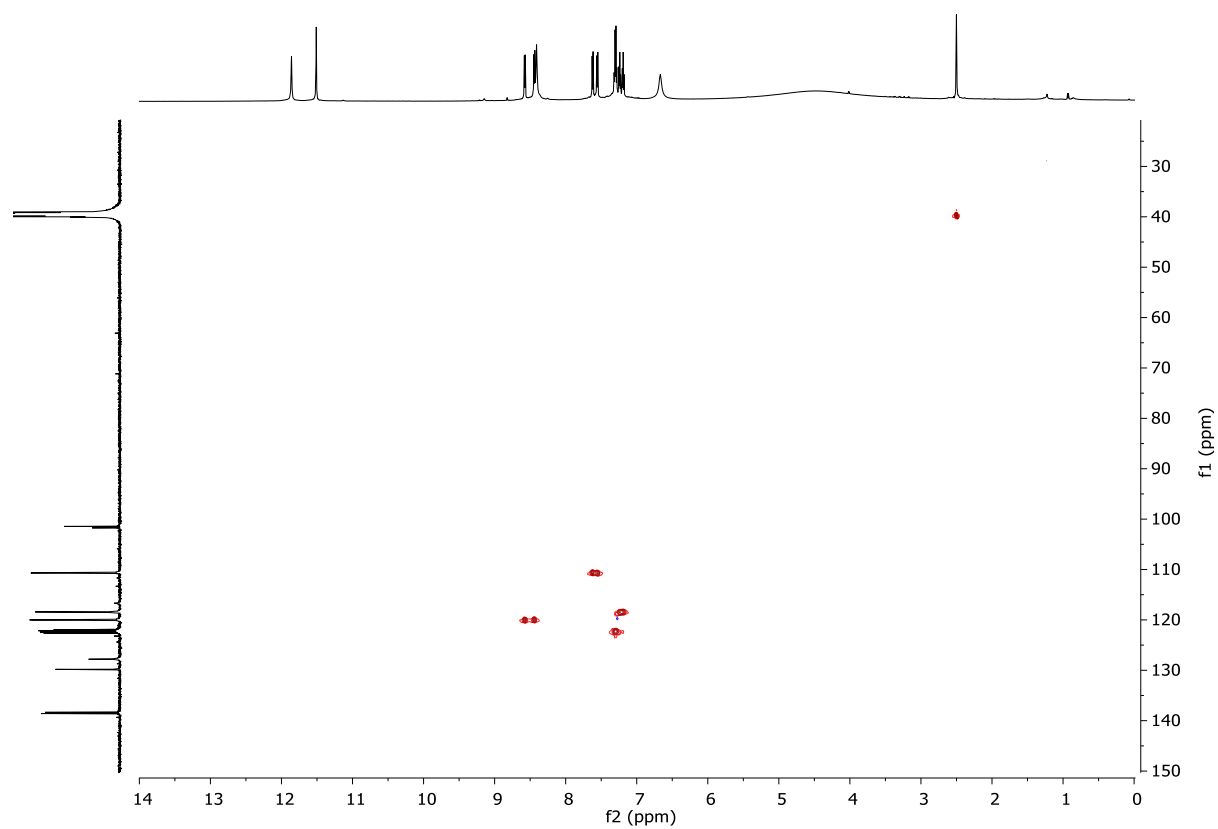

**Figure S4.** COSY Spectrum of **1** in DMSO-*d*<sub>6</sub>

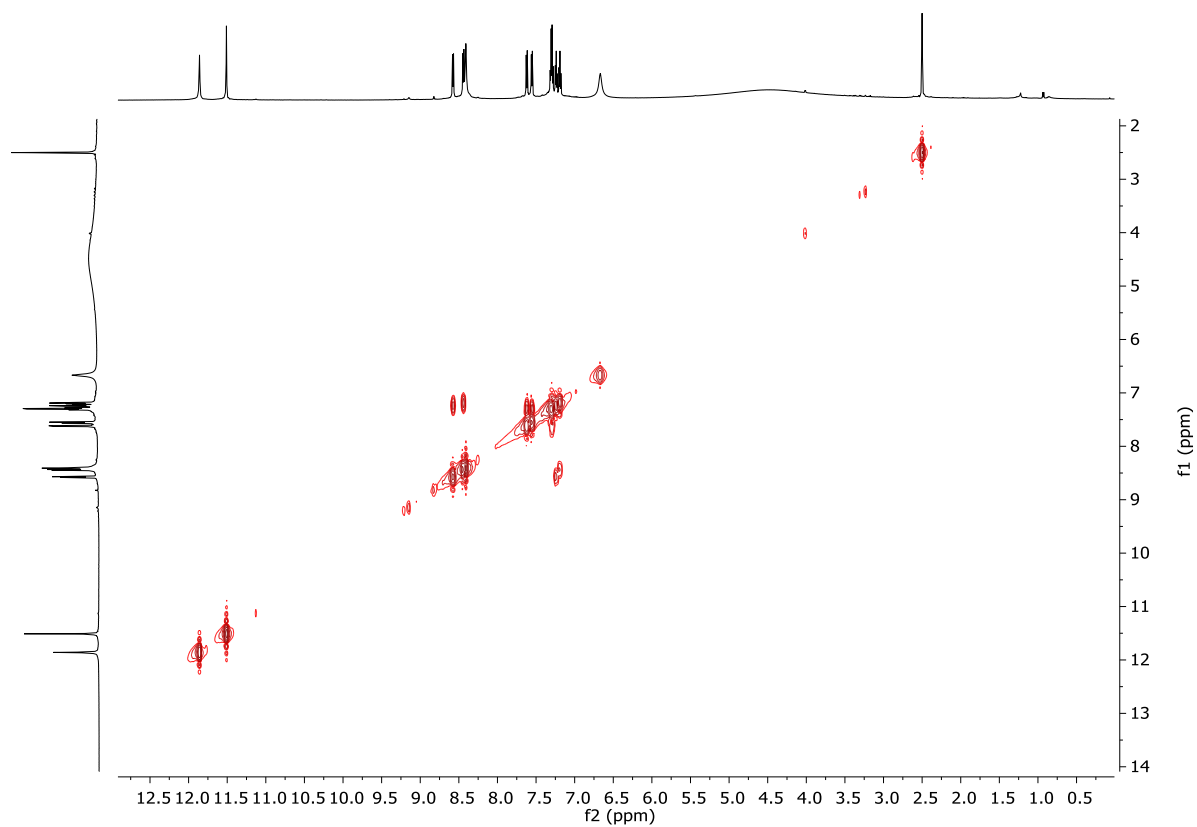

**Figure S5.** HMBC ( $J = 8$  Hz) Spectrum of **1** in DMSO- $d_6$

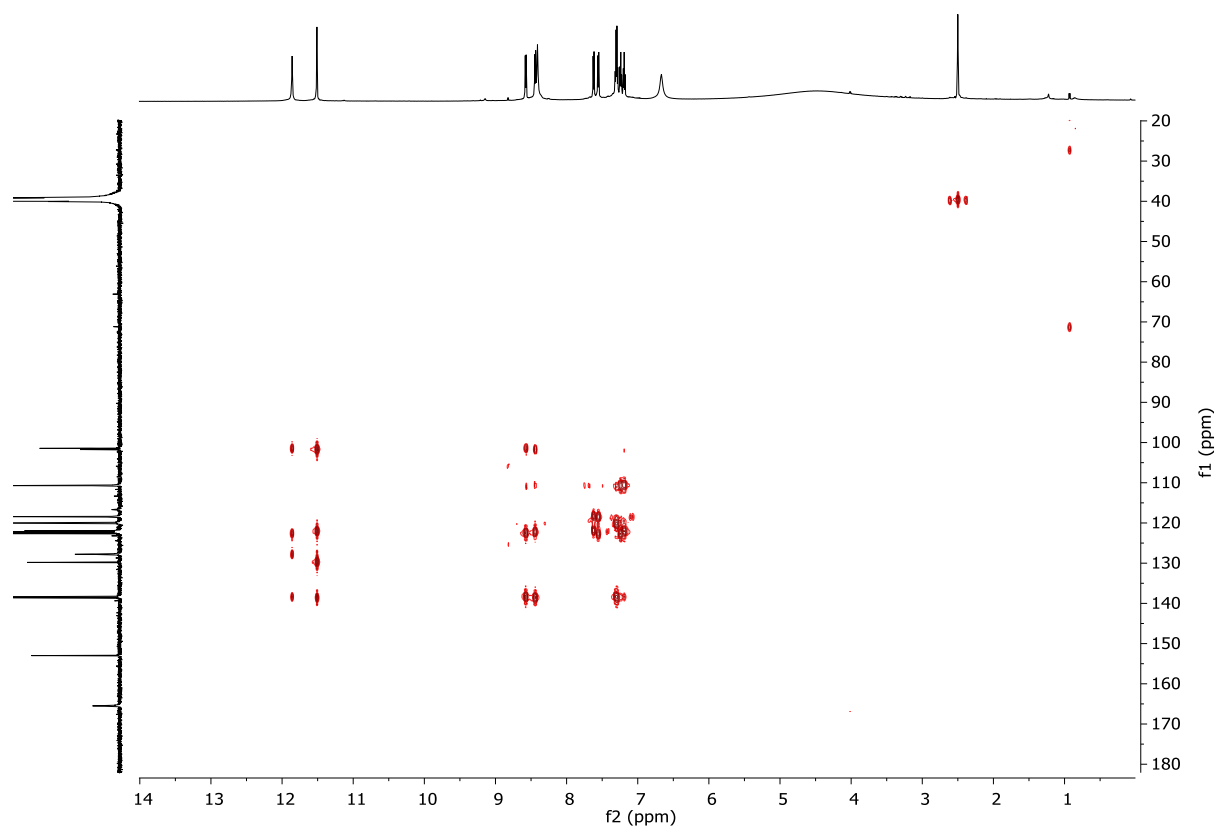

**Figure S6.** HMBC ( $J = 3$  Hz) Spectrum of **1** in DMSO- $d_6$

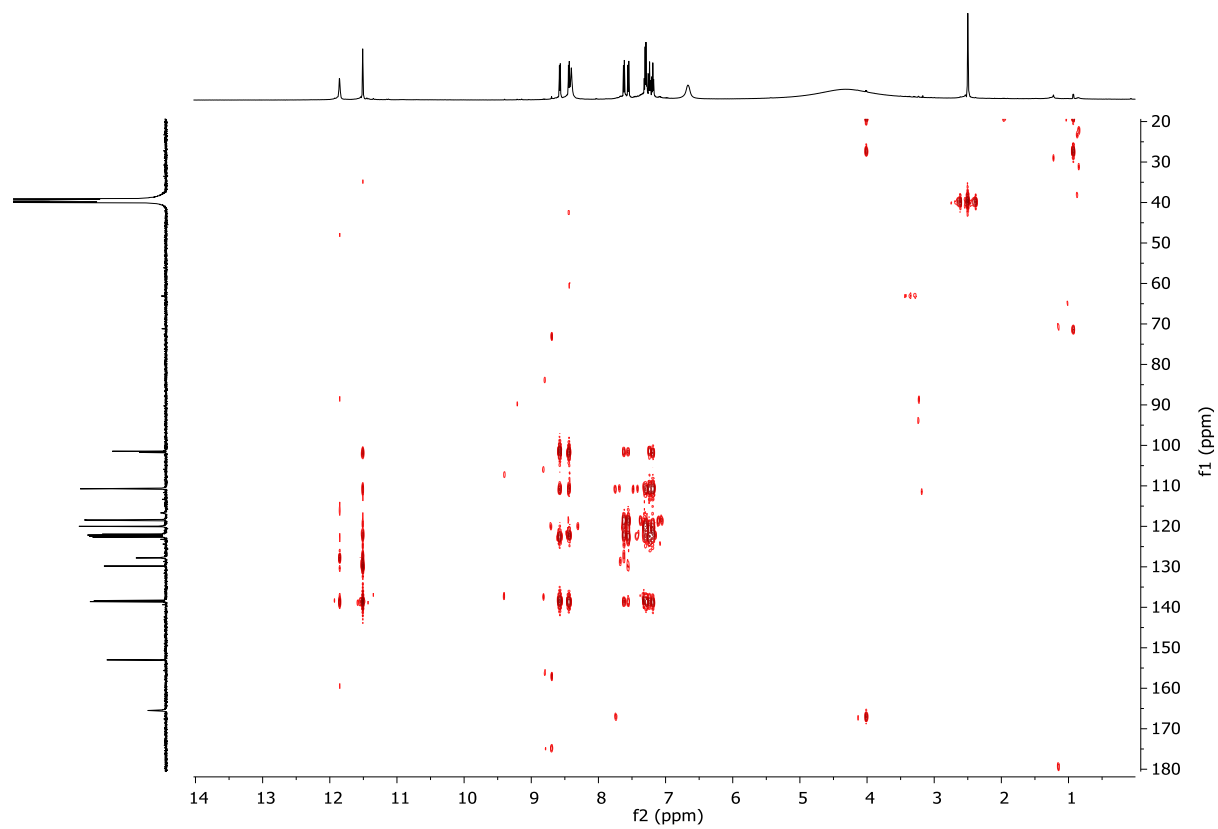

**Figure S7.** ROESY Spectrum of **1** in DMSO-*d*<sub>6</sub>

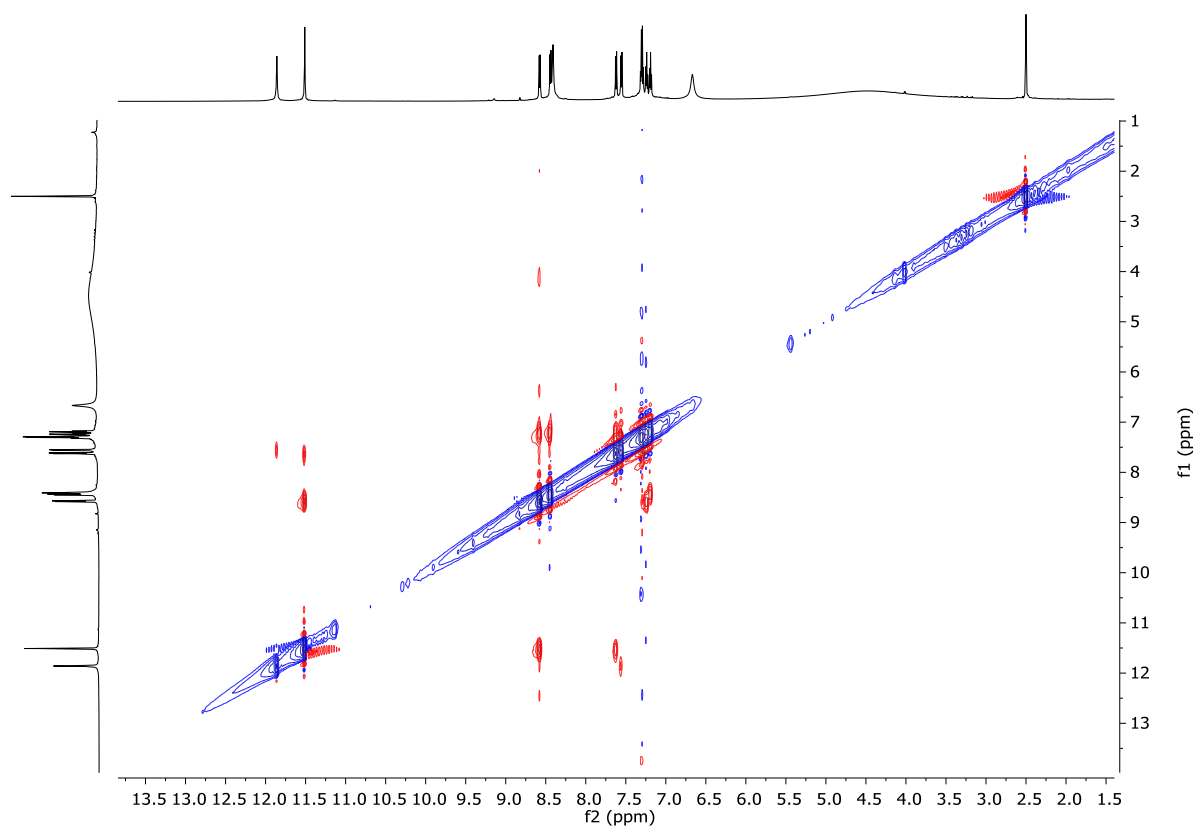

**Figure S8.**  $^1\text{H}$  Spectrum of **2** in  $\text{DMSO-}d_6$

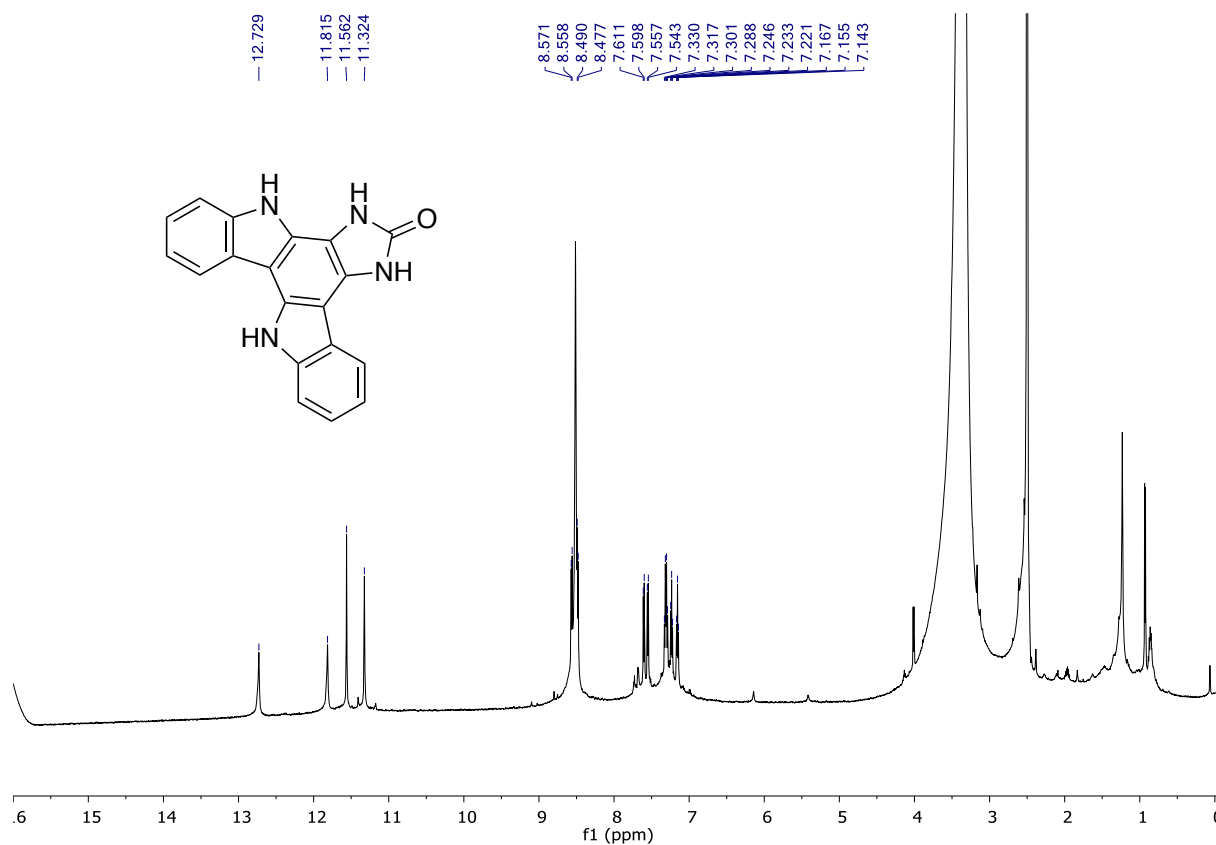

**Figure S9.**  $^{13}\text{C}$  Spectrum of **2** in  $\text{DMSO-}d_6$

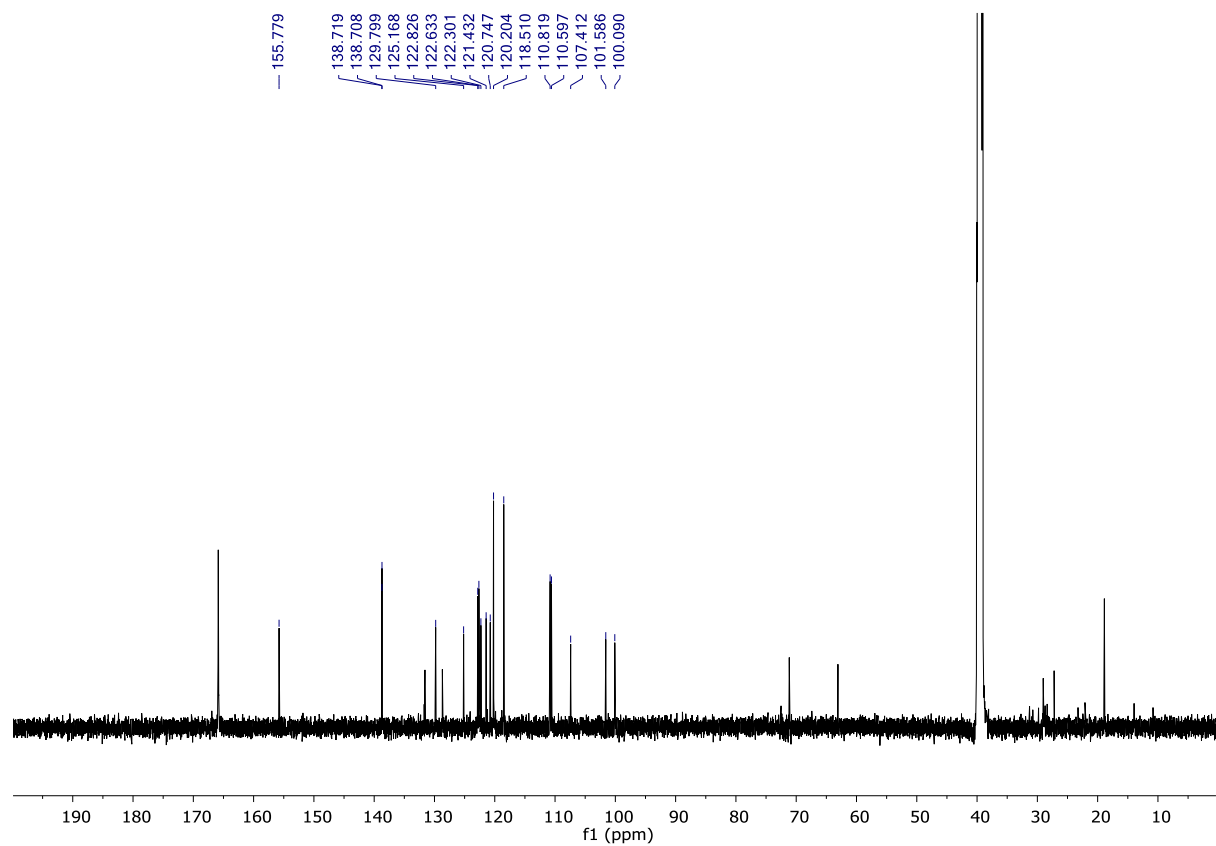

**Figure S10.** HSQC Spectrum of **2** in DMSO-*d*<sub>6</sub>

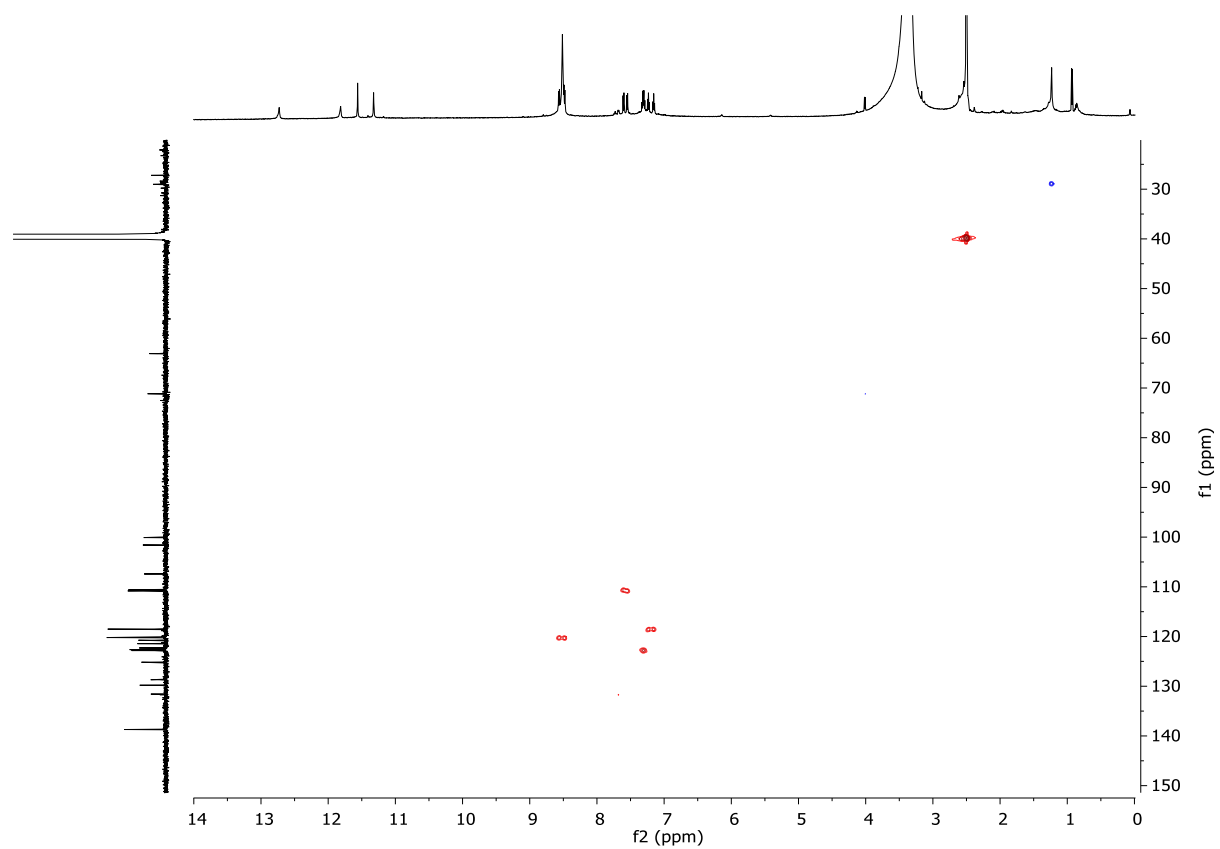

**Figure S11.** COSY Spectrum of **2** in DMSO-*d*<sub>6</sub>

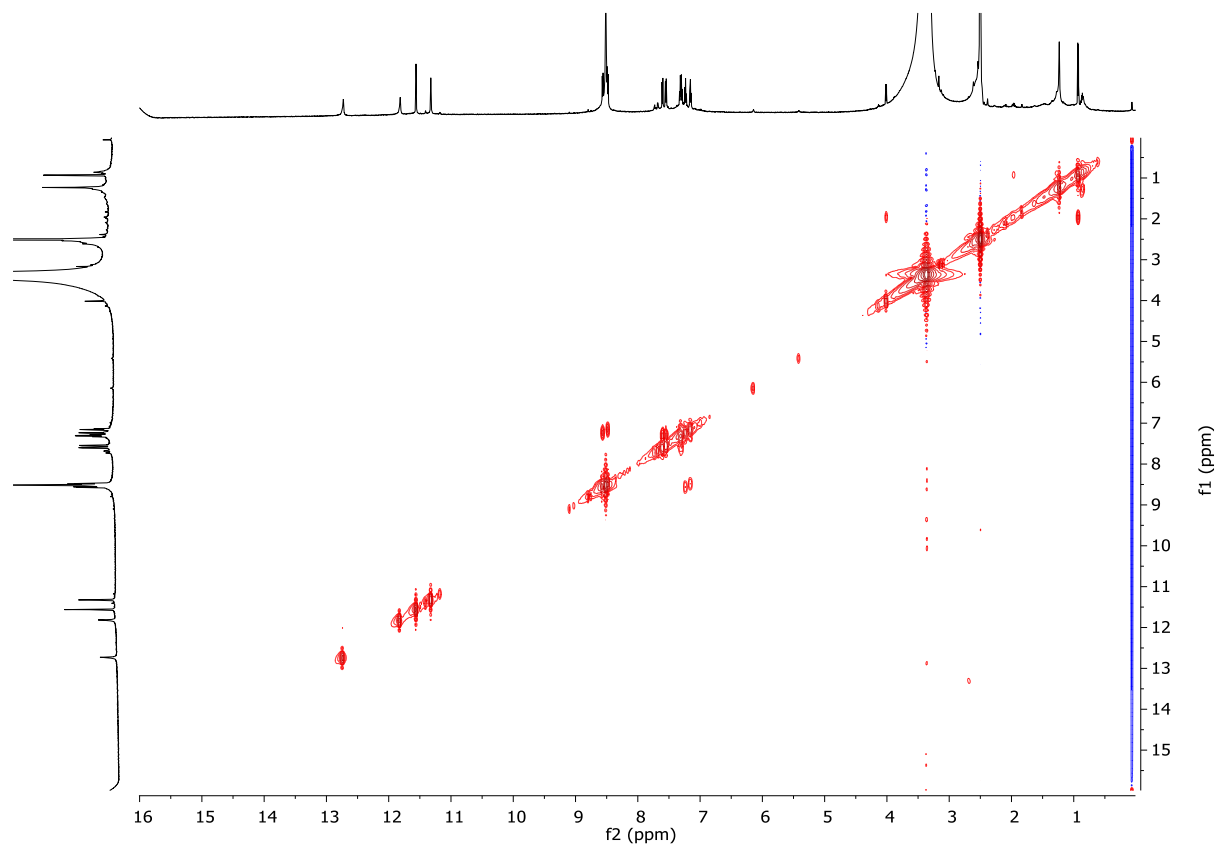



**Figure S12.** HMBC ( $J = 8$  Hz) Spectrum of **2** in DMSO- $d_6$

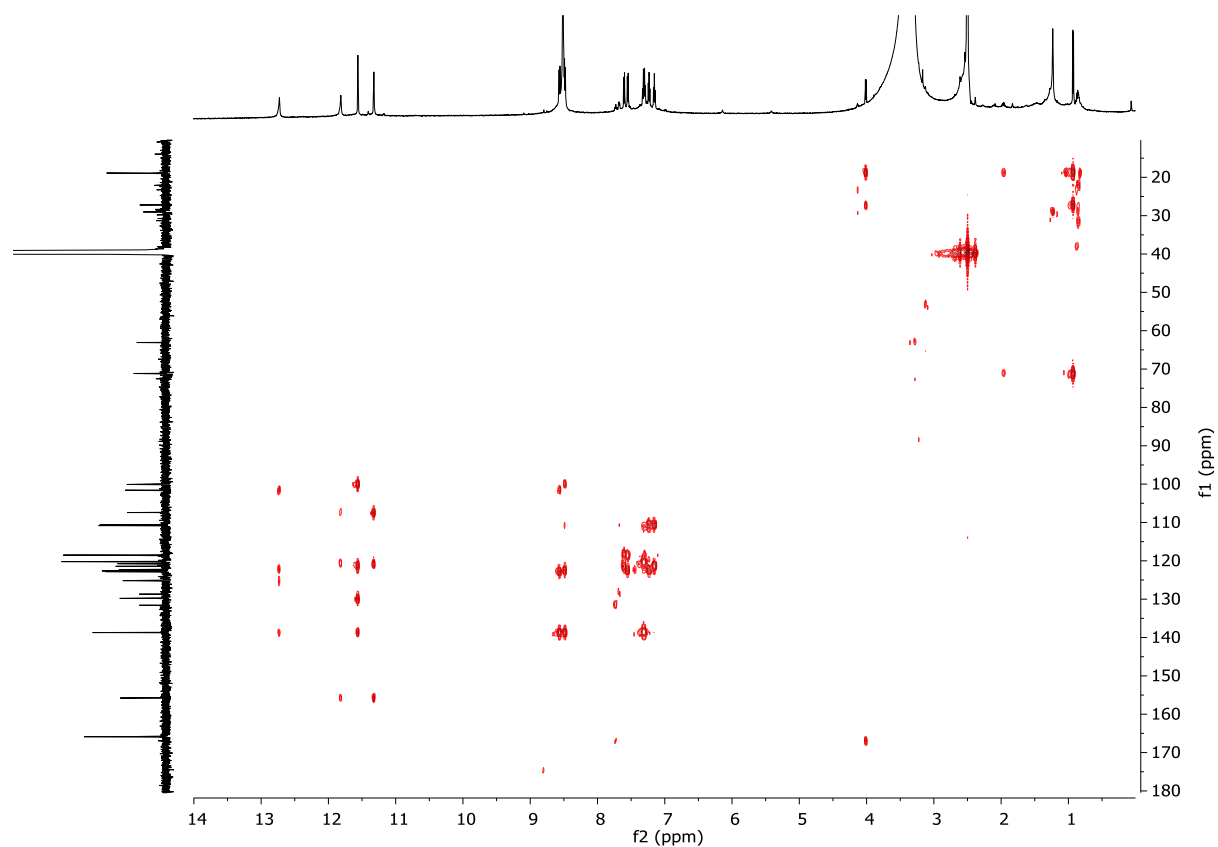

**Figure S13.** HMBC ( $J = 3$  Hz) Spectrum of **2** in DMSO- $d_6$

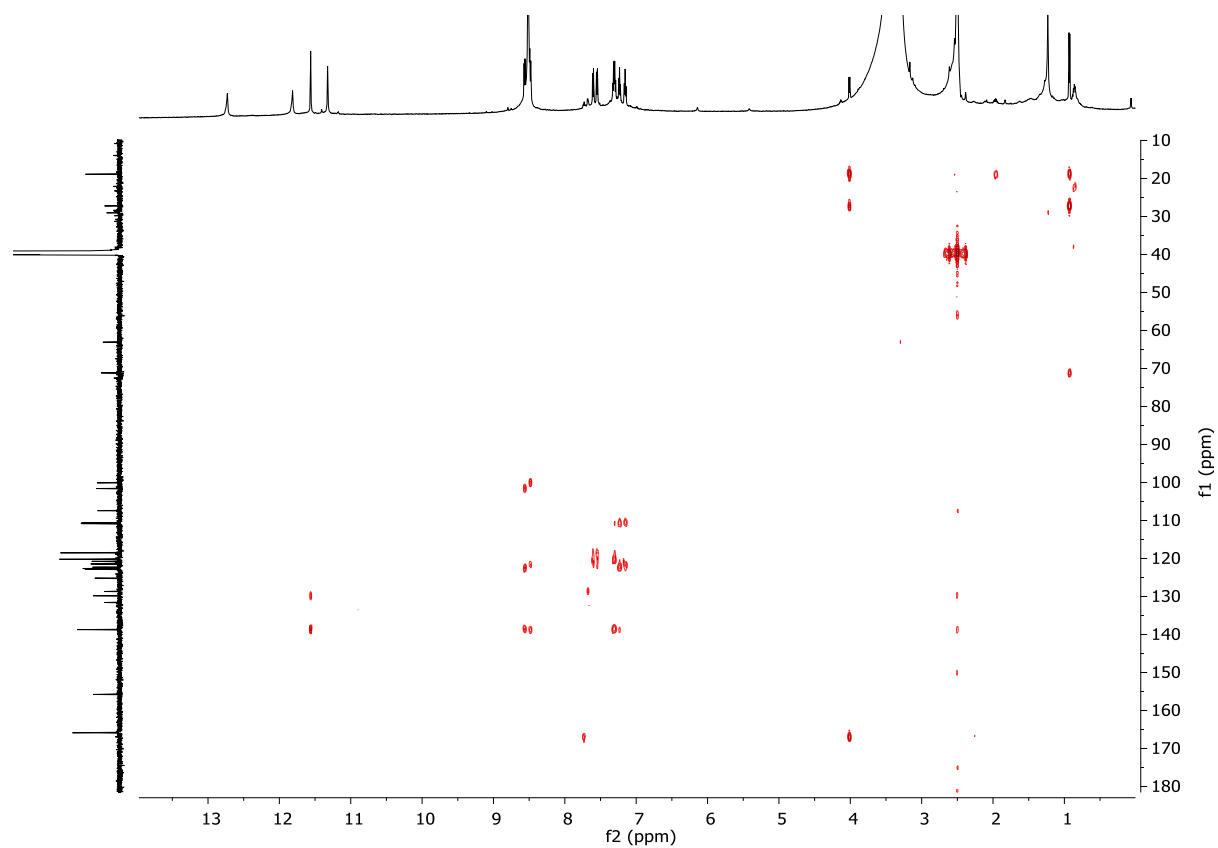

**Figure S14.** LR-HSQMBC ( $J = 2$  Hz) Spectrum of **2** in DMSO- $d_6$

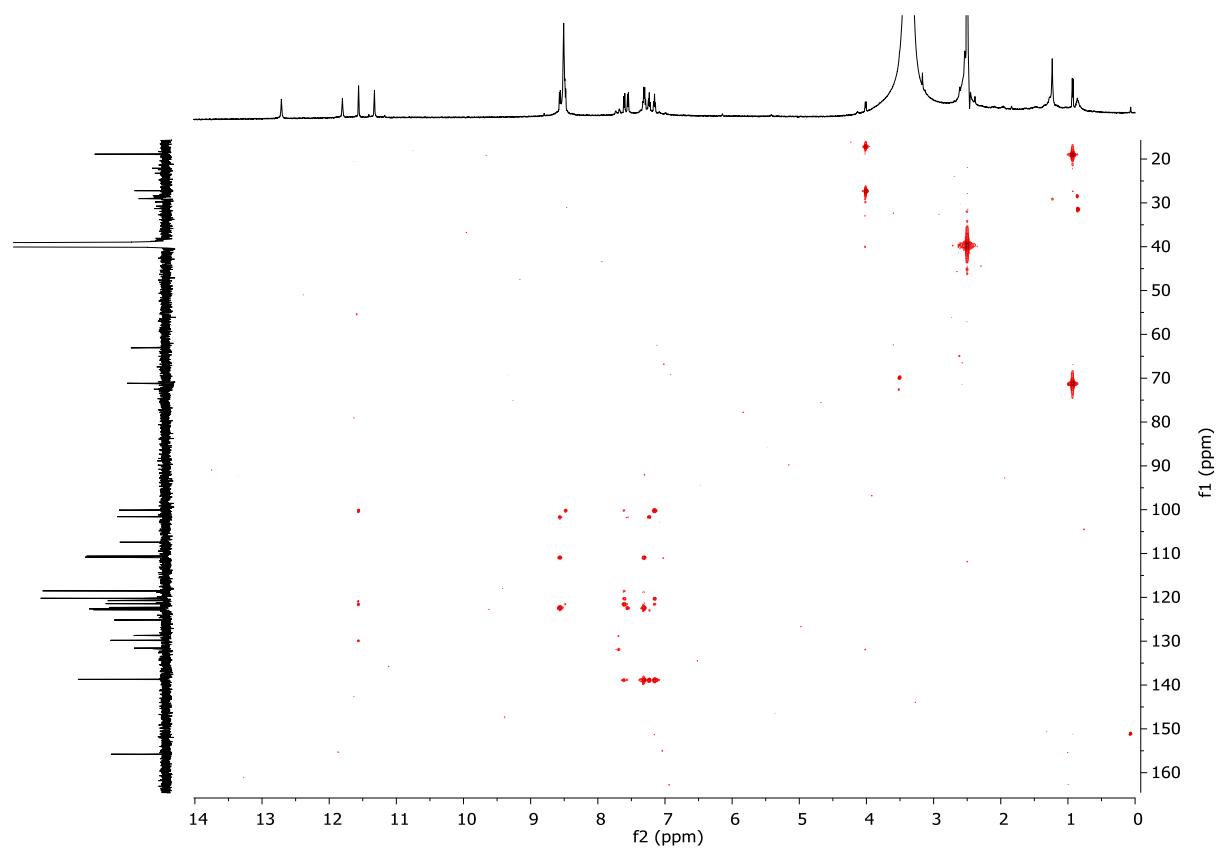

**Figure S15.** ROESY Spectrum of **2** in DMSO- $d_6$

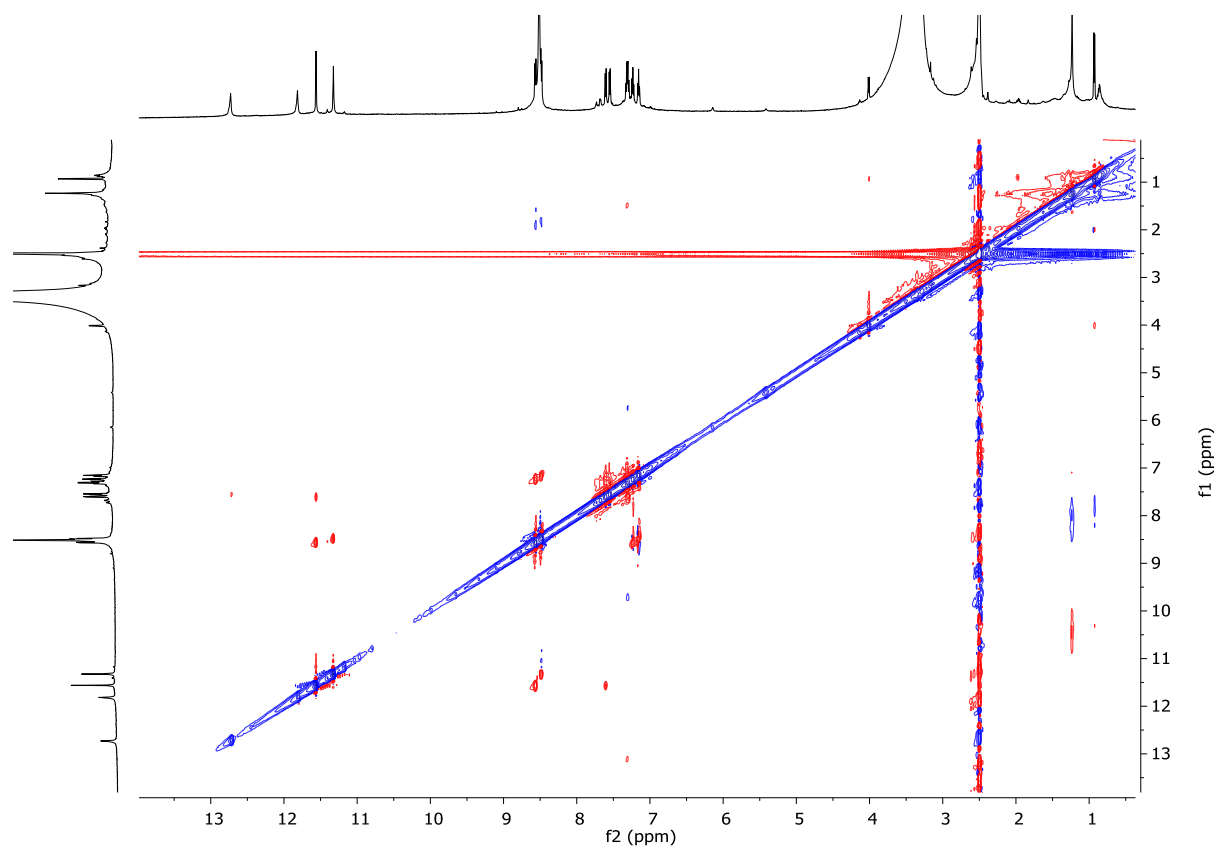

**Figure S16.**  $^1\text{H}$ - $^{15}\text{N}$  HSQC Spectrum of **2** in  $\text{DMSO-}d_6$

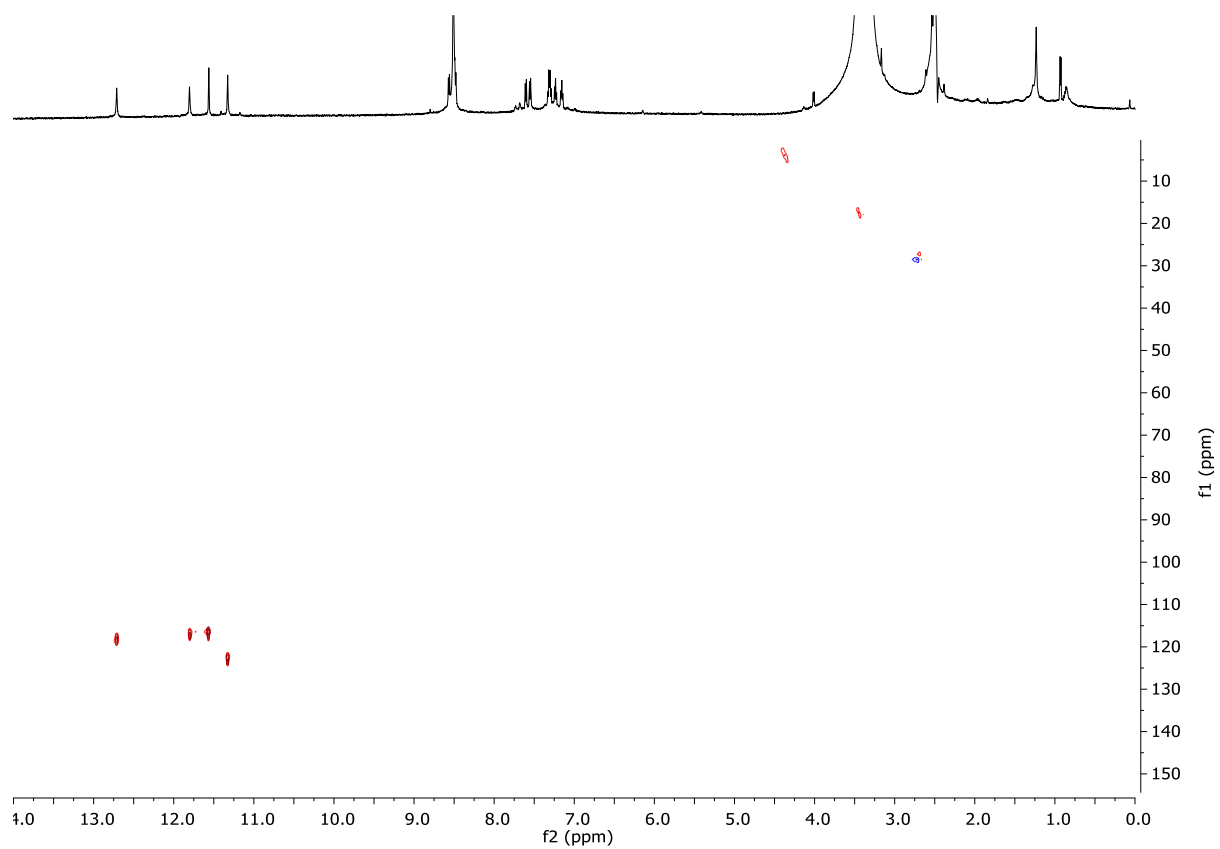

**Figure S17.** Underwater Photograph of *Damiria* sp.

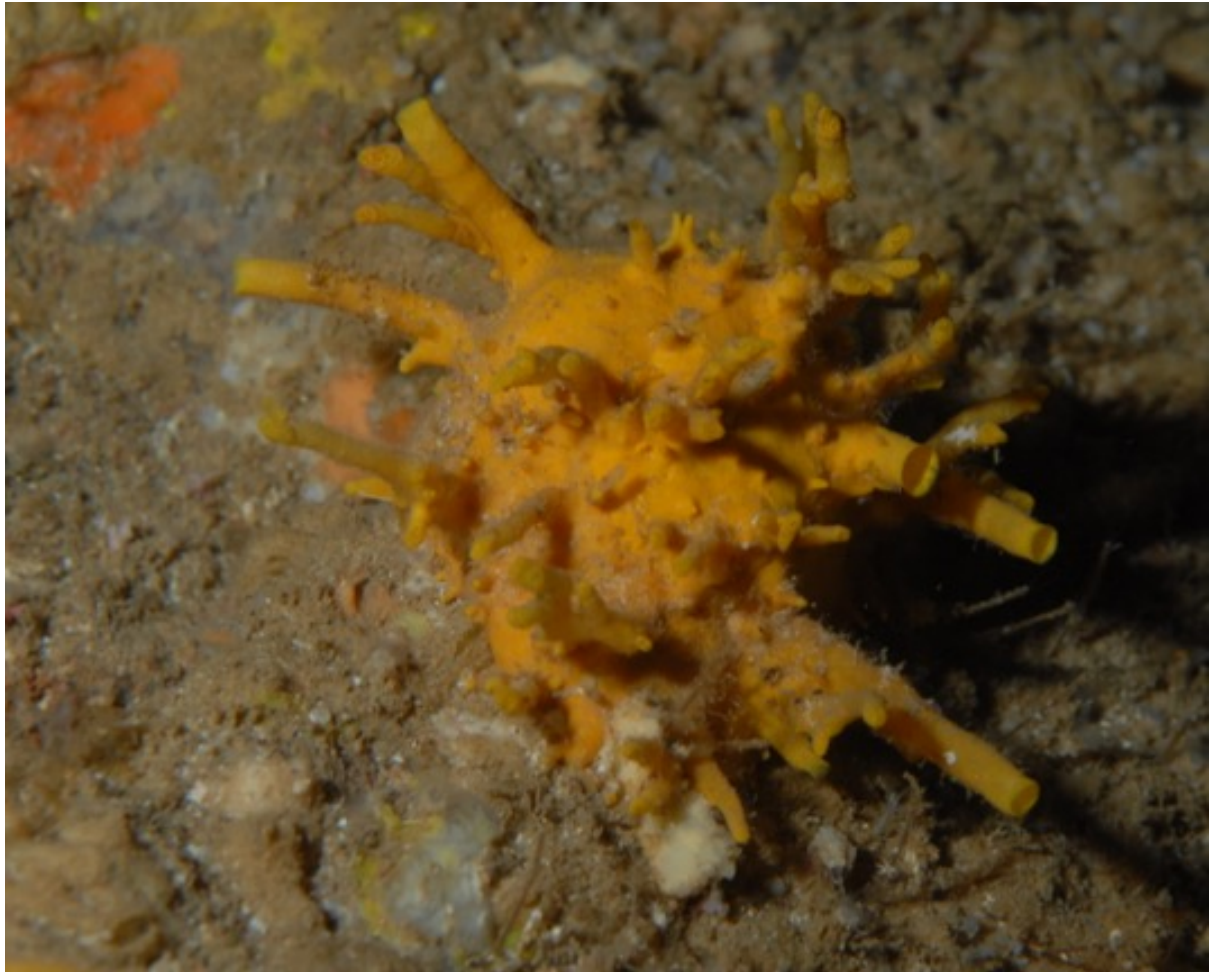

**Figure S18. NCI-60 Cell Line Anticancer Screening Data**

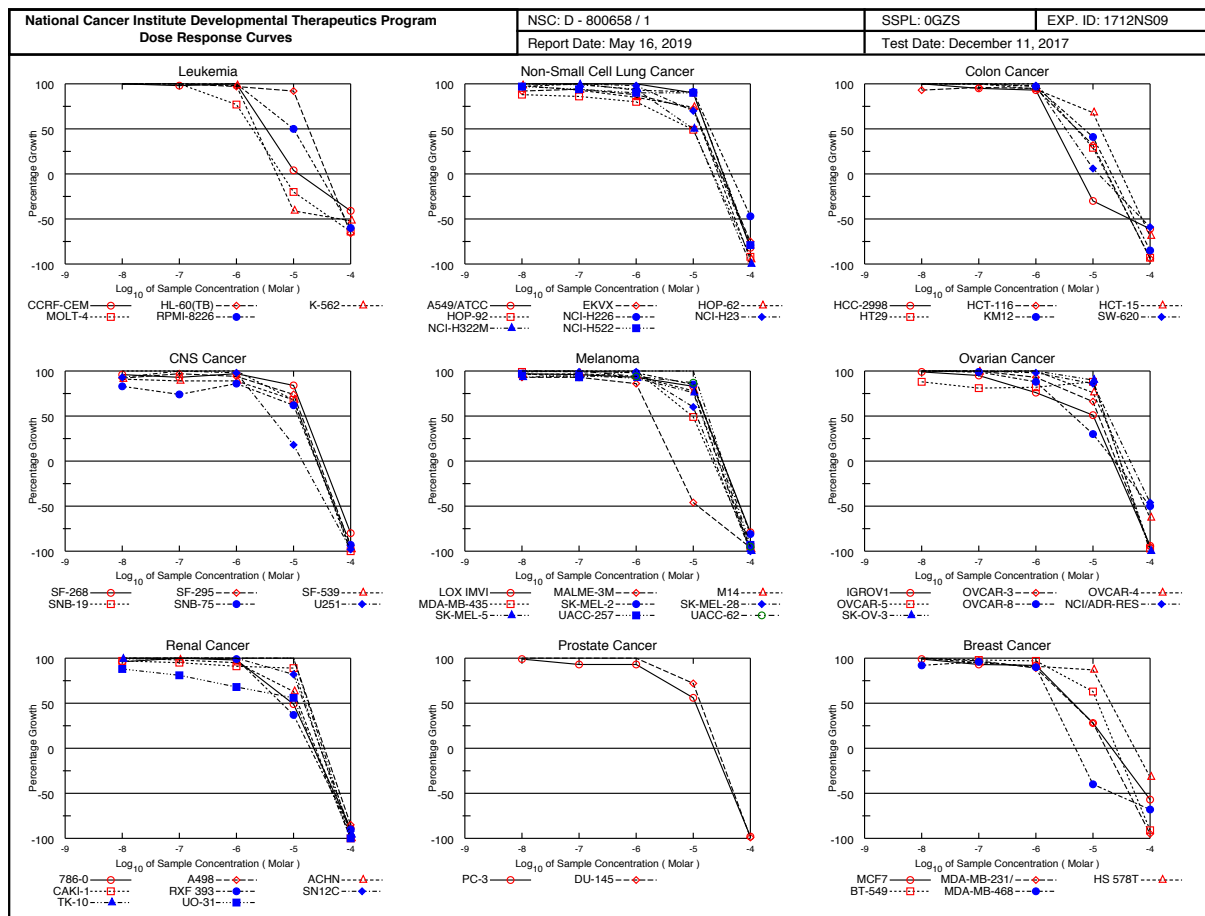

**Figure S19. GIAO nuclear magnetic shielding tensors for damirines A (1) in DMSO**

SCF GIAO Magnetic shielding tensor (ppm):

|              |          |             |          |              |          |
|--------------|----------|-------------|----------|--------------|----------|
| 1            | N        | Isotropic = | 199.3256 | Anisotropy = | 101.1541 |
| XX=          | 162.3543 | YX=         | -39.3419 | ZX=          | -0.0043  |
| XY=          | -27.4900 | YY=         | 256.0668 | ZY=          | 0.0134   |
| XZ=          | 0.0075   | YZ=         | -0.0177  | ZZ=          | 179.5558 |
| Eigenvalues: | 151.6594 | 179.5558    | 266.7617 |              |          |
| 2            | C        | Isotropic = | 28.2395  | Anisotropy = | 84.3976  |
| XX=          | 29.9983  | YX=         | -10.2442 | ZX=          | 0.0010   |
| XY=          | -32.2576 | YY=         | -29.7845 | ZY=          | -0.0045  |
| XZ=          | 0.0002   | YZ=         | 0.0008   | ZZ=          | 84.5045  |
| Eigenvalues: | -36.5686 | 36.7825     | 84.5045  |              |          |
| 3            | N        | Isotropic = | 54.1688  | Anisotropy = | 258.4352 |
| XX=          | 8.5044   | YX=         | 42.8055  | ZX=          | -0.0001  |
| XY=          | 45.4120  | YY=         | -72.4570 | ZY=          | 0.0019   |
| XZ=          | -0.0097  | YZ=         | 0.0065   | ZZ=          | 226.4589 |
| Eigenvalues: | -91.8450 | 27.8925     | 226.4589 |              |          |
| 4            | C        | Isotropic = | 55.4805  | Anisotropy = | 101.1711 |
| XX=          | 26.2413  | YX=         | -4.6475  | ZX=          | -0.0004  |
| XY=          | 15.6935  | YY=         | 17.2724  | ZY=          | 0.0007   |
| XZ=          | -0.0037  | YZ=         | 0.0001   | ZZ=          | 122.9279 |
| Eigenvalues: | 14.6425  | 28.8712     | 122.9279 |              |          |
| 5            | C        | Isotropic = | 52.3425  | Anisotropy = | 116.0975 |
| XX=          | 23.2456  | YX=         | 24.4976  | ZX=          | -0.0006  |
| XY=          | 22.8027  | YY=         | 4.0410   | ZY=          | 0.0009   |
| XZ=          | -0.0001  | YZ=         | 0.0018   | ZZ=          | 129.7408 |
| Eigenvalues: | -11.8819 | 39.1685     | 129.7408 |              |          |
| 6            | N        | Isotropic = | 120.4556 | Anisotropy = | 49.0421  |
| XX=          | 67.2897  | YX=         | 23.4698  | ZX=          | -0.0012  |
| XY=          | 7.7364   | YY=         | 140.9268 | ZY=          | 0.0013   |
| XZ=          | -0.0021  | YZ=         | 0.0022   | ZZ=          | 153.1504 |
| Eigenvalues: | 64.1200  | 144.0965    | 153.1504 |              |          |
| 7            | C        | Isotropic = | 78.5027  | Anisotropy = | 113.1487 |
| XX=          | 39.8100  | YX=         | -10.4030 | ZX=          | -0.0006  |
| XY=          | -1.8366  | YY=         | 41.7629  | ZY=          | 0.0003   |
| XZ=          | -0.0009  | YZ=         | -0.0006  | ZZ=          | 153.9352 |
| Eigenvalues: | 34.5892  | 46.9837     | 153.9352 |              |          |
| 8            | C        | Isotropic = | 48.2181  | Anisotropy = | 119.7792 |
| XX=          | 25.6623  | YX=         | -8.6792  | ZX=          | -0.0005  |
| XY=          | -14.6172 | YY=         | -9.0788  | ZY=          | 0.0004   |
| XZ=          | -0.0045  | YZ=         | -0.0002  | ZZ=          | 128.0709 |
| Eigenvalues: | -12.6228 | 29.2062     | 128.0709 |              |          |
| 9            | N        | Isotropic = | 125.0515 | Anisotropy = | 54.7981  |
| XX=          | 119.4071 | YX=         | 29.0842  | ZX=          | -0.0012  |
| XY=          | 28.0514  | YY=         | 94.1639  | ZY=          | 0.0019   |
| XZ=          | -0.0010  | YZ=         | 0.0000   | ZZ=          | 161.5836 |
| Eigenvalues: | 75.5537  | 138.0173    | 161.5836 |              |          |
| 10           | C        | Isotropic = | 40.1714  | Anisotropy = | 142.6695 |
| XX=          | -34.0717 | YX=         | 14.4677  | ZX=          | -0.0004  |
| XY=          | 17.7044  | YY=         | 19.3016  | ZY=          | 0.0010   |
| XZ=          | -0.0001  | YZ=         | 0.0043   | ZZ=          | 135.2844 |
| Eigenvalues: | -38.5450 | 23.7748     | 135.2844 |              |          |
| 11           | C        | Isotropic = | 56.9383  | Anisotropy = | 154.9175 |
| XX=          | 17.7924  | YX=         | -15.3318 | ZX=          | -0.0005  |

|              |             |          |              |     |          |          |  |
|--------------|-------------|----------|--------------|-----|----------|----------|--|
| XY=          | -20.8836    | YY=      | -7.1941      | ZY= | 0.0006   |          |  |
| XZ=          | 0.0005      | YZ=      | 0.0003       | ZZ= | 160.2167 |          |  |
| Eigenvalues: | -16.7002    |          | 27.2985      |     | 160.2167 |          |  |
| 12 C         | Isotropic = | 59.1155  | Anisotropy = |     |          | 164.8311 |  |
| XX=          | 27.8758     | YX=      | 33.2778      | ZX= | -0.0006  |          |  |
| XY=          | 35.7577     | YY=      | -19.5322     | ZY= | 0.0013   |          |  |
| XZ=          | -0.0005     | YZ=      | 0.0011       | ZZ= | 169.0028 |          |  |
| Eigenvalues: | -37.7013    |          | 46.0449      |     | 169.0028 |          |  |
| 13 C         | Isotropic = | 59.5606  | Anisotropy = |     |          | 169.5692 |  |
| XX=          | -43.8721    | YX=      | 17.3729      | ZX= | -0.0006  |          |  |
| XY=          | 20.1289     | YY=      | 49.9471      | ZY= | 0.0010   |          |  |
| XZ=          | -0.0007     | YZ=      | 0.0009       | ZZ= | 172.6067 |          |  |
| Eigenvalues: | -47.4808    |          | 53.5559      |     | 172.6067 |          |  |
| 14 C         | Isotropic = | 55.7181  | Anisotropy = |     |          | 175.8003 |  |
| XX=          | 11.0130     | YX=      | -44.3879     | ZX= | 0.0000   |          |  |
| XY=          | -49.2016    | YY=      | -16.7770     | ZY= | 0.0013   |          |  |
| XZ=          | 0.0001      | YZ=      | 0.0009       | ZZ= | 172.9183 |          |  |
| Eigenvalues: | -51.6961    |          | 45.9321      |     | 172.9183 |          |  |
| 15 C         | Isotropic = | 69.1971  | Anisotropy = |     |          | 149.7041 |  |
| XX=          | 50.6184     | YX=      | 21.0312      | ZX= | -0.0002  |          |  |
| XY=          | 17.9605     | YY=      | -12.0270     | ZY= | 0.0015   |          |  |
| XZ=          | 0.0002      | YZ=      | 0.0006       | ZZ= | 168.9998 |          |  |
| Eigenvalues: | -17.5987    |          | 56.1901      |     | 168.9998 |          |  |
| 16 C         | Isotropic = | 77.8363  | Anisotropy = |     |          | 114.1172 |  |
| XX=          | 36.5293     | YX=      | 3.0363       | ZX= | 0.0000   |          |  |
| XY=          | 9.7955      | YY=      | 43.0651      | ZY= | -0.0001  |          |  |
| XZ=          | 0.0010      | YZ=      | -0.0010      | ZZ= | 153.9145 |          |  |
| Eigenvalues: | 32.5970     |          | 46.9974      |     | 153.9145 |          |  |
| 17 C         | Isotropic = | 49.1332  | Anisotropy = |     |          | 122.4210 |  |
| XX=          | -5.4427     | YX=      | -1.5154      | ZX= | -0.0001  |          |  |
| XY=          | -13.4917    | YY=      | 22.0951      | ZY= | 0.0005   |          |  |
| XZ=          | 0.0009      | YZ=      | 0.0023       | ZZ= | 130.7472 |          |  |
| Eigenvalues: | -7.3546     |          | 24.0069      |     | 130.7472 |          |  |
| 18 N         | Isotropic = | 127.2444 | Anisotropy = |     |          | 58.5206  |  |
| XX=          | 127.2833    | YX=      | -25.5663     | ZX= | 0.0003   |          |  |
| XY=          | -25.6880    | YY=      | 88.1917      | ZY= | 0.0008   |          |  |
| XZ=          | 0.0004      | YZ=      | 0.0004       | ZZ= | 166.2581 |          |  |
| Eigenvalues: | 75.5073     |          | 139.9677     |     | 166.2581 |          |  |
| 19 C         | Isotropic = | 39.8890  | Anisotropy = |     |          | 142.9454 |  |
| XX=          | 20.2462     | YX=      | 14.1376      | ZX= | 0.0002   |          |  |
| XY=          | 17.0164     | YY=      | -35.7651     | ZY= | 0.0000   |          |  |
| XZ=          | 0.0019      | YZ=      | 0.0006       | ZZ= | 135.1860 |          |  |
| Eigenvalues: | -39.8057    |          | 24.2868      |     | 135.1860 |          |  |
| 20 C         | Isotropic = | 55.0875  | Anisotropy = |     |          | 154.3055 |  |
| XX=          | -18.2292    | YX=      | 0.0610       | ZX= | 0.0005   |          |  |
| XY=          | -4.6943     | YY=      | 25.5339      | ZY= | 0.0000   |          |  |
| XZ=          | -0.0001     | YZ=      | -0.0005      | ZZ= | 157.9578 |          |  |
| Eigenvalues: | -18.3515    |          | 25.6562      |     | 157.9578 |          |  |
| 21 C         | Isotropic = | 59.0117  | Anisotropy = |     |          | 164.0005 |  |
| XX=          | 22.3283     | YX=      | -38.9256     | ZX= | 0.0003   |          |  |
| XY=          | -36.6444    | YY=      | -13.6386     | ZY= | -0.0001  |          |  |
| XZ=          | 0.0005      | YZ=      | 0.0003       | ZZ= | 168.3454 |          |  |
| Eigenvalues: | -37.5015    |          | 46.1912      |     | 168.3454 |          |  |
| 22 C         | Isotropic = | 59.2725  | Anisotropy = |     |          | 169.5688 |  |
| XX=          | 42.0245     | YX=      | 30.4610      | ZX= | 0.0004   |          |  |
| XY=          | 33.1254     | YY=      | -36.5255     | ZY= | -0.0002  |          |  |

|              |             |         |              |     |          |          |
|--------------|-------------|---------|--------------|-----|----------|----------|
| XZ=          | 0.0004      | YZ=     | -0.0003      | ZZ= | 172.3184 |          |
| Eigenvalues: | -47.7810    |         | 53.2800      |     | 172.3184 |          |
| 23 C         | Isotropic = | 55.4654 | Anisotropy = |     |          | 176.6037 |
| XX=          | -50.7622    | YX=     | 13.5527      | ZX= | 0.0006   |          |
| XY=          | 8.8610      | YY=     | 43.9573      | ZY= | -0.0001  |          |
| XZ=          | 0.0005      | YZ=     | -0.0002      | ZZ= | 173.2012 |          |
| Eigenvalues: | -52.0701    |         | 45.2652      |     | 173.2012 |          |
| 24 C         | Isotropic = | 69.0863 | Anisotropy = |     |          | 150.2300 |
| XX=          | 20.8356     | YX=     | -35.2773     | ZX= | 0.0004   |          |
| XY=          | -38.3624    | YY=     | 17.1836      | ZY= | 0.0000   |          |
| XZ=          | 0.0002      | YZ=     | -0.0004      | ZZ= | 169.2396 |          |
| Eigenvalues: | -17.8555    |         | 55.8747      |     | 169.2396 |          |
| 25 H         | Isotropic = | 27.5397 | Anisotropy = |     |          | 14.1316  |
| XX=          | 27.3019     | YX=     | 1.9046       | ZX= | 0.0007   |          |
| XY=          | 6.1958      | YY=     | 35.2624      | ZY= | 0.0038   |          |
| XZ=          | 0.0013      | YZ=     | 0.0050       | ZZ= | 20.0548  |          |
| Eigenvalues: | 20.0548     |         | 25.6035      |     | 36.9608  |          |
| 26 H         | Isotropic = | 27.5410 | Anisotropy = |     |          | 13.1402  |
| XX=          | 34.2463     | YX=     | -2.7581      | ZX= | -0.0039  |          |
| XY=          | -5.1370     | YY=     | 28.7174      | ZY= | 0.0024   |          |
| XZ=          | -0.0056     | YZ=     | 0.0030       | ZZ= | 19.6593  |          |
| Eigenvalues: | 19.6593     |         | 26.6626      |     | 36.3011  |          |
| 27 H         | Isotropic = | 23.5509 | Anisotropy = |     |          | 9.6397   |
| XX=          | 29.7068     | YX=     | 0.9907       | ZX= | 0.0000   |          |
| XY=          | 0.6904      | YY=     | 27.3656      | ZY= | 0.0001   |          |
| XZ=          | -0.0002     | YZ=     | 0.0000       | ZZ= | 13.5803  |          |
| Eigenvalues: | 13.5803     |         | 27.0951      |     | 29.9773  |          |
| 28 H         | Isotropic = | 23.2328 | Anisotropy = |     |          | 11.3122  |
| XX=          | 29.2774     | YX=     | -1.6613      | ZX= | 0.0002   |          |
| XY=          | -1.3051     | YY=     | 29.3045      | ZY= | -0.0002  |          |
| XZ=          | 0.0004      | YZ=     | -0.0007      | ZZ= | 11.1164  |          |
| Eigenvalues: | 11.1164     |         | 27.8077      |     | 30.7742  |          |
| 29 H         | Isotropic = | 23.6030 | Anisotropy = |     |          | 9.3235   |
| XX=          | 28.5900     | YX=     | 2.0968       | ZX= | 0.0000   |          |
| XY=          | 2.4716      | YY=     | 25.5720      | ZY= | 0.0000   |          |
| XZ=          | 0.0000      | YZ=     | 0.0000       | ZZ= | 16.6470  |          |
| Eigenvalues: | 16.6470     |         | 24.3434      |     | 29.8187  |          |
| 30 H         | Isotropic = | 24.3326 | Anisotropy = |     |          | 5.3820   |
| XX=          | 25.8357     | YX=     | 0.8118       | ZX= | 0.0000   |          |
| XY=          | 0.9201      | YY=     | 27.5610      | ZY= | 0.0000   |          |
| XZ=          | 0.0000      | YZ=     | 0.0000       | ZZ= | 19.6012  |          |
| Eigenvalues: | 19.6012     |         | 25.4761      |     | 27.9206  |          |
| 31 H         | Isotropic = | 24.2599 | Anisotropy = |     |          | 4.8907   |
| XX=          | 27.1063     | YX=     | -0.7772      | ZX= | 0.0000   |          |
| XY=          | -0.8266     | YY=     | 25.9673      | ZY= | 0.0000   |          |
| XZ=          | 0.0000      | YZ=     | -0.0001      | ZZ= | 19.7061  |          |
| Eigenvalues: | 19.7061     |         | 25.5533      |     | 27.5204  |          |
| 32 H         | Isotropic = | 24.0666 | Anisotropy = |     |          | 7.0470   |
| XX=          | 27.8846     | YX=     | 1.5526       | ZX= | 0.0000   |          |
| XY=          | 1.5222      | YY=     | 26.0788      | ZY= | 0.0000   |          |
| XZ=          | 0.0000      | YZ=     | -0.0001      | ZZ= | 18.2364  |          |
| Eigenvalues: | 18.2364     |         | 25.1988      |     | 28.7646  |          |
| 33 H         | Isotropic = | 23.5552 | Anisotropy = |     |          | 10.7047  |
| XX=          | 27.8873     | YX=     | 1.0149       | ZX= | 0.0000   |          |
| XY=          | 1.7136      | YY=     | 30.0280      | ZY= | -0.0001  |          |
| XZ=          | -0.0002     | YZ=     | -0.0003      | ZZ= | 12.7503  |          |



|              |             |         |              |        |         |
|--------------|-------------|---------|--------------|--------|---------|
| Eigenvalues: | 12.7503     | 27.2237 | 30.6917      |        |         |
| 34 H         | Isotropic = | 23.4932 | Anisotropy = | 9.7743 |         |
| XX=          | 28.5419     | YX=     | -2.7638      | ZX=    | 0.0000  |
| XY=          | -2.2343     | YY=     | 25.7539      | ZY=    | 0.0000  |
| XZ=          | 0.0000      | YZ=     | 0.0000       | ZZ=    | 16.1840 |
| Eigenvalues: | 16.1840     | 24.2863 | 30.0094      |        |         |
| 35 H         | Isotropic = | 24.3208 | Anisotropy = | 5.4594 |         |
| XX=          | 27.9140     | YX=     | 0.2840       | ZX=    | 0.0000  |
| XY=          | 0.3927      | YY=     | 25.4886      | ZY=    | 0.0000  |
| XZ=          | 0.0000      | YZ=     | 0.0000       | ZZ=    | 19.5596 |
| Eigenvalues: | 19.5596     | 25.4423 | 27.9604      |        |         |
| 36 H         | Isotropic = | 24.2536 | Anisotropy = | 4.8349 |         |
| XX=          | 25.5478     | YX=     | -0.0366      | ZX=    | 0.0000  |
| XY=          | -0.0821     | YY=     | 27.4751      | ZY=    | 0.0000  |
| XZ=          | 0.0000      | YZ=     | 0.0000       | ZZ=    | 19.7381 |
| Eigenvalues: | 19.7381     | 25.5460 | 27.4769      |        |         |
| 37 H         | Isotropic = | 24.1187 | Anisotropy = | 6.8107 |         |
| XX=          | 27.8812     | YX=     | -1.4309      | ZX=    | 0.0000  |
| XY=          | -1.4203     | YY=     | 26.0466      | ZY=    | 0.0000  |
| XZ=          | 0.0000      | YZ=     | 0.0000       | ZZ=    | 18.4281 |
| Eigenvalues: | 18.4281     | 25.2687 | 28.6591      |        |         |

### Calculating GIAO nuclear magnetic shielding tensors for TMS in DMSO.

SCF GIAO Magnetic shielding tensor (ppm):

|              |             |          |              |         |          |
|--------------|-------------|----------|--------------|---------|----------|
| 1 C          | Isotropic = | 184.7055 | Anisotropy = | 10.1581 |          |
| XX=          | 184.6788    | YX=      | -0.8392      | ZX=     | -4.7131  |
| XY=          | -0.8277     | YY=      | 181.5183     | ZY=     | 1.1055   |
| XZ=          | -4.7132     | YZ=      | 1.1249       | ZZ=     | 187.9194 |
| Eigenvalues: | 181.2889    | 181.3501 | 191.4776     |         |          |
| 2 Si         | Isotropic = | 339.7811 | Anisotropy = | 0.2642  |          |
| XX=          | 339.6943    | YX=      | 0.0547       | ZX=     | 0.1194   |
| XY=          | -0.0101     | YY=      | 339.7450     | ZY=     | -0.1055  |
| XZ=          | -0.0329     | YZ=      | -0.0987      | ZZ=     | 339.9040 |
| Eigenvalues: | 339.6542    | 339.7318 | 339.9572     |         |          |
| 3 C          | Isotropic = | 184.7097 | Anisotropy = | 10.0531 |          |
| XX=          | 181.9032    | YX=      | 2.0294       | ZX=     | -0.9879  |
| XY=          | 2.0897      | YY=      | 189.2537     | ZY=     | -3.5612  |
| XZ=          | -0.9896     | YZ=      | -3.5661      | ZZ=     | 182.9720 |
| Eigenvalues: | 181.3065    | 181.4107 | 191.4117     |         |          |
| 4 C          | Isotropic = | 184.6954 | Anisotropy = | 10.1004 |          |
| XX=          | 188.4201    | YX=      | -4.0398      | ZX=     | 2.2476   |
| XY=          | -4.0060     | YY=      | 183.5983     | ZY=     | -1.3258  |
| XZ=          | 2.2504      | YZ=      | -1.3390      | ZZ=     | 182.0677 |
| Eigenvalues: | 181.2789    | 181.3783 | 191.4289     |         |          |
| 5 C          | Isotropic = | 184.6900 | Anisotropy = | 10.0010 |          |
| XX=          | 183.8138    | YX=      | 2.7164       | ZX=     | 3.3481   |
| XY=          | 2.6923      | YY=      | 184.3525     | ZY=     | 3.7258   |
| XZ=          | 3.2866      | YZ=      | 3.7162       | ZZ=     | 185.9035 |
| Eigenvalues: | 181.3267    | 181.3859 | 191.3573     |         |          |
| 6 H          | Isotropic = | 31.9458  | Anisotropy = | 9.2668  |          |
| XX=          | 29.9046     | YX=      | 2.3567       | ZX=     | -2.6912  |
| XY=          | 2.1649      | YY=      | 33.7443      | ZY=     | -3.4860  |

|              |             |         |              |     |         |        |  |
|--------------|-------------|---------|--------------|-----|---------|--------|--|
| XZ=          | -2.6758     | YZ=     | -3.7575      | ZZ= | 32.1885 |        |  |
| Eigenvalues: | 28.1251     |         | 29.5886      |     | 38.1236 |        |  |
| 7 H          | Isotropic = | 31.9458 | Anisotropy = |     |         | 9.2749 |  |
| XX=          | 29.8036     | YX=     | 1.3382       | ZX= | 1.2120  |        |  |
| XY=          | 1.4792      | YY=     | 30.7716      | ZY= | 4.0477  |        |  |
| XZ=          | 1.4953      | YZ=     | 4.1760       | ZZ= | 35.2621 |        |  |
| Eigenvalues: | 28.1247     |         | 29.5836      |     | 38.1291 |        |  |
| 8 H          | Isotropic = | 31.9450 | Anisotropy = |     |         | 9.2633 |  |
| XX=          | 36.1271     | YX=     | -4.0003      | ZX= | -0.2527 |        |  |
| XY=          | -3.9420     | YY=     | 30.1464      | ZY= | -0.1463 |        |  |
| XZ=          | -0.5531     | YZ=     | 0.0087       | ZZ= | 29.5616 |        |  |
| Eigenvalues: | 28.1247     |         | 29.5897      |     | 38.1206 |        |  |
| 9 H          | Isotropic = | 31.9469 | Anisotropy = |     |         | 9.2749 |  |
| XX=          | 31.3300     | YX=     | 0.6991       | ZX= | -4.5670 |        |  |
| XY=          | 0.8952      | YY=     | 29.8518      | ZY= | -1.3960 |        |  |
| XZ=          | -4.5807     | YZ=     | -1.1265      | ZZ= | 34.6590 |        |  |
| Eigenvalues: | 28.1239     |         | 29.5868      |     | 38.1302 |        |  |
| 10 H         | Isotropic = | 31.9442 | Anisotropy = |     |         | 9.2690 |  |
| XX=          | 32.9298     | YX=     | -3.5091      | ZX= | 1.9228  |        |  |
| XY=          | -3.8177     | YY=     | 33.4157      | ZY= | -2.6902 |        |  |
| XZ=          | 2.0618      | YZ=     | -2.6772      | ZZ= | 29.4871 |        |  |
| Eigenvalues: | 28.1192     |         | 29.5899      |     | 38.1235 |        |  |
| 11 H         | Isotropic = | 31.9458 | Anisotropy = |     |         | 9.2640 |  |
| XX=          | 30.5391     | YX=     | 3.5830       | ZX= | 2.2989  |        |  |
| XY=          | 3.6935      | YY=     | 34.2519      | ZY= | 2.7688  |        |  |
| XZ=          | 2.1706      | YZ=     | 2.4706       | ZZ= | 31.0465 |        |  |
| Eigenvalues: | 28.1232     |         | 29.5925      |     | 38.1219 |        |  |
| 12 H         | Isotropic = | 31.9463 | Anisotropy = |     |         | 9.2731 |  |
| XX=          | 34.2671     | YX=     | -2.3309      | ZX= | -4.0758 |        |  |
| XY=          | -2.3871     | YY=     | 29.0997      | ZY= | 1.2333  |        |  |
| XZ=          | -3.7743     | YZ=     | 1.0822       | ZZ= | 32.4721 |        |  |
| Eigenvalues: | 28.1267     |         | 29.5839      |     | 38.1284 |        |  |
| 13 H         | Isotropic = | 31.9448 | Anisotropy = |     |         | 9.2660 |  |
| XX=          | 33.3027     | YX=     | 1.5855       | ZX= | 4.4800  |        |  |
| XY=          | 1.3364      | YY=     | 30.0759      | ZY= | 2.1150  |        |  |
| XZ=          | 4.3265      | YZ=     | 2.2848       | ZZ= | 32.4559 |        |  |
| Eigenvalues: | 28.1198     |         | 29.5925      |     | 38.1221 |        |  |
| 14 H         | Isotropic = | 31.9474 | Anisotropy = |     |         | 9.2651 |  |
| XX=          | 29.6446     | YX=     | -0.7392      | ZX= | 0.4317  |        |  |
| XY=          | -0.4338     | YY=     | 36.2621      | ZY= | -3.8227 |        |  |
| XZ=          | 0.2865      | YZ=     | -3.8445      | ZZ= | 29.9355 |        |  |
| Eigenvalues: | 28.1248     |         | 29.5933      |     | 38.1241 |        |  |
| 15 H         | Isotropic = | 31.9479 | Anisotropy = |     |         | 9.2702 |  |
| XX=          | 30.2733     | YX=     | -0.2942      | ZX= | -2.5505 |        |  |
| XY=          | -0.4351     | YY=     | 29.3342      | ZY= | 2.8522  |        |  |
| XZ=          | -2.8372     | YZ=     | 2.7272       | ZZ= | 36.2362 |        |  |
| Eigenvalues: | 28.1235     |         | 29.5921      |     | 38.1281 |        |  |
| 16 H         | Isotropic = | 31.9470 | Anisotropy = |     |         | 9.2588 |  |
| XX=          | 29.5864     | YX=     | 3.3674       | ZX= | 0.0051  |        |  |
| XY=          | 3.2579      | YY=     | 36.7050      | ZY= | -1.2248 |        |  |
| XZ=          | 0.1348      | YZ=     | -0.9292      | ZZ= | 29.5498 |        |  |
| Eigenvalues: | 28.1246     |         | 29.5970      |     | 38.1196 |        |  |
| 17 H         | Isotropic = | 31.9462 | Anisotropy = |     |         | 9.2655 |  |
| XX=          | 35.6398     | YX=     | -2.0640      | ZX= | 3.7795  |        |  |
| XY=          | -1.8137     | YY=     | 29.6852      | ZY= | -0.2496 |        |  |
| XZ=          | 3.9373      | YZ=     | -0.4142      | ZZ= | 30.5137 |        |  |

Eigenvalues: 28.1208 29.5946 38.1232

Calculated GIAO nuclear magnetic shielding tensors for benzene in DMSO.

SCF GIAO Magnetic shielding tensor (ppm):

|              |          |             |          |              |          |
|--------------|----------|-------------|----------|--------------|----------|
| 1            | C        | Isotropic = | 49.3770  | Anisotropy = | 187.0180 |
| XX=          | -20.8367 | YX=         | 50.2295  | ZX=          | -0.0126  |
| XY=          | 50.2263  | YY=         | -5.0880  | ZY=          | 0.0001   |
| XZ=          | -0.0034  | YZ=         | 0.0073   | ZZ=          | 174.0557 |
| Eigenvalues: | -63.8037 |             | 37.8791  |              | 174.0557 |
| 2            | C        | Isotropic = | 49.3755  | Anisotropy = | 187.0164 |
| XX=          | 34.4553  | YX=         | -18.3091 | ZX=          | 0.0019   |
| XY=          | -18.3080 | YY=         | -60.3820 | ZY=          | -0.0115  |
| XZ=          | 0.0002   | YZ=         | 0.0070   | ZZ=          | 174.0531 |
| Eigenvalues: | -63.7938 |             | 37.8670  |              | 174.0531 |
| 3            | C        | Isotropic = | 49.3756  | Anisotropy = | 187.0105 |
| XX=          | -52.5268 | YX=         | -31.9208 | ZX=          | 0.0232   |
| XY=          | -31.9282 | YY=         | 26.6042  | ZY=          | 0.0039   |
| XZ=          | 0.0150   | YZ=         | 0.0069   | ZZ=          | 174.0492 |
| Eigenvalues: | -63.8002 |             | 37.8777  |              | 174.0492 |
| 4            | C        | Isotropic = | 49.3779  | Anisotropy = | 187.0182 |
| XX=          | -20.8183 | YX=         | 50.2236  | ZX=          | 0.0054   |
| XY=          | 50.2389  | YY=         | -5.1046  | ZY=          | 0.0058   |
| XZ=          | 0.0085   | YZ=         | -0.0102  | ZZ=          | 174.0567 |
| Eigenvalues: | -63.8034 |             | 37.8805  |              | 174.0567 |
| 5            | C        | Isotropic = | 49.3769  | Anisotropy = | 187.0166 |
| XX=          | 34.4627  | YX=         | -18.2814 | ZX=          | -0.0034  |
| XY=          | -18.2985 | YY=         | -60.3867 | ZY=          | 0.0044   |
| XZ=          | 0.0019   | YZ=         | 0.0006   | ZZ=          | 174.0546 |
| Eigenvalues: | -63.7914 |             | 37.8674  |              | 174.0546 |
| 6            | C        | Isotropic = | 49.3758  | Anisotropy = | 187.0089 |
| XX=          | -52.5374 | YX=         | -31.9152 | ZX=          | -0.0118  |
| XY=          | -31.9038 | YY=         | 26.6164  | ZY=          | -0.0000  |
| XZ=          | -0.0179  | YZ=         | -0.0075  | ZZ=          | 174.0484 |
| Eigenvalues: | -63.7989 |             | 37.8780  |              | 174.0484 |
| 7            | H        | Isotropic = | 24.2620  | Anisotropy = | 4.8431   |
| XX=          | 25.4855  | YX=         | 1.7154   | ZX=          | -0.0003  |
| XY=          | 1.7157   | YY=         | 26.0229  | ZY=          | 0.0001   |
| XZ=          | 0.0002   | YZ=         | 0.0001   | ZZ=          | 21.2776  |
| Eigenvalues: | 21.2776  |             | 24.0178  |              | 27.4907  |
| 8            | H        | Isotropic = | 24.2625  | Anisotropy = | 4.8428   |
| XX=          | 27.3748  | YX=         | -0.6244  | ZX=          | 0.0001   |
| XY=          | -0.6248  | YY=         | 24.1361  | ZY=          | 0.0001   |
| XZ=          | 0.0000   | YZ=         | 0.0004   | ZZ=          | 21.2768  |
| Eigenvalues: | 21.2768  |             | 24.0198  |              | 27.4911  |
| 9            | H        | Isotropic = | 24.2637  | Anisotropy = | 4.8428   |
| XX=          | 24.4041  | YX=         | -1.0892  | ZX=          | 0.0003   |
| XY=          | -1.0891  | YY=         | 27.1081  | ZY=          | 0.0000   |
| XZ=          | -0.0005  | YZ=         | -0.0001  | ZZ=          | 21.2789  |
| Eigenvalues: | 21.2789  |             | 24.0199  |              | 27.4922  |
| 10           | H        | Isotropic = | 24.2621  | Anisotropy = | 4.8432   |
| XX=          | 25.4844  | YX=         | 1.7152   | ZX=          | 0.0000   |
| XY=          | 1.7157   | YY=         | 26.0243  | ZY=          | 0.0001   |
| XZ=          | 0.0000   | YZ=         | -0.0001  | ZZ=          | 21.2777  |

|              |             |         |              |        |         |
|--------------|-------------|---------|--------------|--------|---------|
| Eigenvalues: | 21.2777     | 24.0178 | 27.4909      |        |         |
| 11 H         | Isotropic = | 24.2627 | Anisotropy = | 4.8428 |         |
| XX=          | 27.3746     | YX=     | -0.6253      | ZX=    | -0.0001 |
| XY=          | -0.6259     | YY=     | 24.1366      | ZY=    | -0.0003 |
| XZ=          | 0.0001      | YZ=     | -0.0003      | ZZ=    | 21.2769 |
| Eigenvalues: | 21.2769     | 24.0200 | 27.4912      |        |         |
| 12 H         | Isotropic = | 24.2636 | Anisotropy = | 4.8427 |         |
| XX=          | 24.4048     | YX=     | -1.0901      | ZX=    | 0.0002  |
| XY=          | -1.0898     | YY=     | 27.1072      | ZY=    | 0.0001  |
| XZ=          | 0.0002      | YZ=     | 0.0000       | ZZ=    | 21.2787 |
| Eigenvalues: | 21.2787     | 24.0200 | 27.4920      |        |         |

**TABLE S1.** Calculated  $^{13}\text{C}$  and  $^1\text{H}$  chemical shifts in DMSO- $d_6$  using TMS or benzene as a standard reference and their statistical parameters.

| Position       | $\delta^{\text{C}}_{\text{exp}}$ | TMS <sup>a</sup>                  |                                     | Benzene <sup>b</sup>              |                                     | $\delta^{\text{H}}_{\text{exp}}$ | TMS <sup>a</sup>                  |                                     | Benzene <sup>b</sup>              |                                     |
|----------------|----------------------------------|-----------------------------------|-------------------------------------|-----------------------------------|-------------------------------------|----------------------------------|-----------------------------------|-------------------------------------|-----------------------------------|-------------------------------------|
|                |                                  | $\delta^{\text{C}}_{\text{calc}}$ | $\delta^{\text{C}}_{\text{calc}^*}$ | $\delta^{\text{C}}_{\text{calc}}$ | $\delta^{\text{C}}_{\text{calc}^*}$ |                                  | $\delta^{\text{H}}_{\text{calc}}$ | $\delta^{\text{H}}_{\text{calc}^*}$ | $\delta^{\text{H}}_{\text{calc}}$ | $\delta^{\text{H}}_{\text{calc}^*}$ |
| 1              | 110.6                            | 115.5                             | 108.9                               | 108.5                             | 108.9                               | 7.62                             | 7.88                              | 7.63                                | 7.57                              | 7.63                                |
| 2              | 122.2                            | 129.0                             | 122.5                               | 122.0                             | 122.5                               | 7.29                             | 7.69                              | 7.31                                | 7.37                              | 7.31                                |
| 3              | 118.4                            | 125.1                             | 118.6                               | 118.1                             | 118.6                               | 7.19                             | 7.61                              | 7.19                                | 7.30                              | 7.19                                |
| 4              | 120.0                            | 125.6                             | 119.1                               | 118.6                             | 119.1                               | 8.44                             | 8.34                              | 8.41                                | 8.03                              | 8.41                                |
| 4a             | 121.9                            | 127.8                             | 121.3                               | 120.7                             | 121.3                               |                                  |                                   |                                     |                                   |                                     |
| 4b             | 101.7                            | 106.2                             | 99.5                                | 99.2                              | 99.5                                |                                  |                                   |                                     |                                   |                                     |
| 4c             | 123.2                            | 132.4                             | 125.9                               | 125.3                             | 125.9                               |                                  |                                   |                                     |                                   |                                     |
| 6              | 153.0                            | 156.5                             | 150.2                               | 149.4                             | 150.2                               |                                  |                                   |                                     |                                   |                                     |
| 7a             | 116.7                            | 129.2                             | 122.7                               | 122.2                             | 122.7                               |                                  |                                   |                                     |                                   |                                     |
| 7b             | 127.8                            | 135.6                             | 129.1                               | 128.5                             | 129.1                               |                                  |                                   |                                     |                                   |                                     |
| 8a             | 138.3                            | 144.8                             | 138.5                               | 137.8                             | 138.5                               |                                  |                                   |                                     |                                   |                                     |
| 9              | 110.7                            | 115.6                             | 109.0                               | 108.6                             | 109.0                               | 7.55                             | 7.83                              | 7.55                                | 7.51                              | 7.55                                |
| 10             | 122.4                            | 129.2                             | 122.8                               | 122.2                             | 122.8                               | 7.30                             | 7.69                              | 7.32                                | 7.38                              | 7.32                                |
| 11             | 118.5                            | 125.4                             | 118.9                               | 118.4                             | 118.9                               | 7.24                             | 7.63                              | 7.21                                | 7.31                              | 7.21                                |
| 12             | 120.0                            | 125.7                             | 119.2                               | 118.7                             | 119.2                               | 8.57                             | 8.45                              | 8.59                                | 8.14                              | 8.59                                |
| 12a            | 122.7                            | 129.6                             | 123.1                               | 122.6                             | 123.1                               |                                  |                                   |                                     |                                   |                                     |
| 12b            | 101.4                            | 106.9                             | 100.2                               | 99.8                              | 100.2                               |                                  |                                   |                                     |                                   |                                     |
| 12c            | 129.8                            | 136.5                             | 130.1                               | 129.5                             | 130.1                               |                                  |                                   |                                     |                                   |                                     |
| 13a            | 138.6                            | 144.5                             | 138.2                               | 137.5                             | 138.2                               |                                  |                                   |                                     |                                   |                                     |
| a              |                                  | 0.9914                            |                                     | 0.9914                            |                                     |                                  | 0.5965                            |                                     | 0.5965                            |                                     |
| b              |                                  | 7.5309                            |                                     | 0.5072                            |                                     |                                  | 3.3265                            |                                     | 3.0132                            |                                     |
| R <sup>2</sup> |                                  | 0.9759                            |                                     | 0.9759                            |                                     |                                  | 0.9983                            |                                     | 0.9983                            |                                     |
| MAE            |                                  | 6.5                               |                                     | 1.4                               |                                     |                                  | 0.29                              |                                     | 0.16                              |                                     |
| CMAE           |                                  |                                   | 1.3                                 |                                   | 1.3                                 |                                  |                                   | 0.02                                |                                   | 0.02                                |

<sup>a</sup> Calculated chemical shifts using TMS as a standard reference.

<sup>b</sup> Calculated chemical shifts using benzene as a standard reference.

$\delta_{\text{calc}^*} = (\delta_{\text{calc}} - \text{b})/\text{a}$ ; where the slope (a), the intercept (b) and the correlation coefficient ( $R^2$ ) were determined from a plot of  $\delta_{\text{calc}}$  against  $\delta_{\text{exp}}$ .
